# Supplementary material for: Two Unusual Cases of Thrombotic Microangiopathies
Source: Preprints.org preprint supplement (doi:10.20944/preprints202405.1033.v1), 2024-05-15
Supplement: Supplementary file 3 [file supplementary]

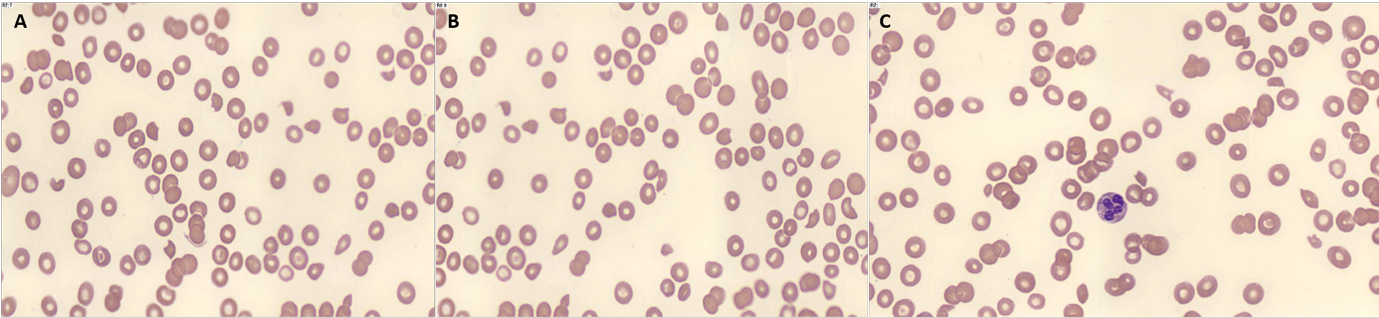
**
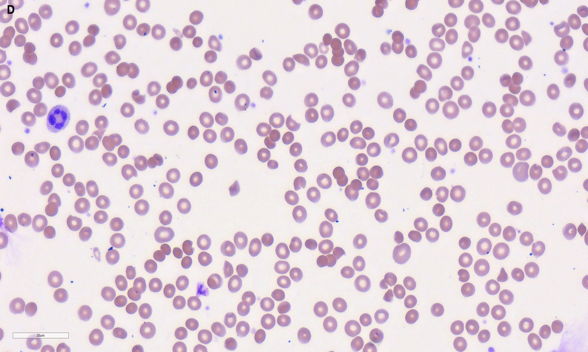

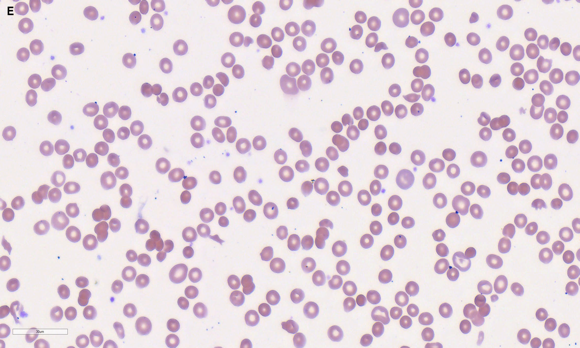
**

Fig. 1. (A) - (C): Red cell fragmentation in the patient with primaquine-induced thrombotic microangiopathies (D) and (E): Red cell fragmentation in the patient with complement-mediated TMA
